# Supplementary material for: Plasmodium malariae and Plasmodium ovale infections in the China–Myanmar border area
Source: PubMed Central journal article supplement (PMC5111346; doi:10.1186/s12936-016-1605-y), 2016-11-15
Supplement: 12936_2016_1605_MOESM1_ESM.pdf [file 12936_2016_1605_MOESM1_ESM.pdf]

## Additional file 1. PCR primer sequences and reaction conditions

| Gene           | Primer name               | Primer sequence              | PCR conditions                                                                                                                                                                                                                      | PCR product size (bp) | Ref. sequences (Genbank No.) |
|----------------|---------------------------|------------------------------|-------------------------------------------------------------------------------------------------------------------------------------------------------------------------------------------------------------------------------------|-----------------------|------------------------------|
| <i>Pocyt b</i> | Pocytb-F1                 | GATATATGCATGCAACTGGTGCA      | The first PCR: 94 °C for 5 min; 94 °C for 1 min, 50 °C for 1 min, 70 °C for 2 min, 30 cycles; 70 °C 10 min.<br>The second PCR: 94 °C for 5 min; 94 °C for 50 sec, 55 °C for 50 sec, 70 °C for 2 min, 35 cycles; 70 °C 10 min.       | 508                   | FJ409567                     |
|                | Pocytb-R1                 | GAACACATAAACCATATAATTGGAA    |                                                                                                                                                                                                                                     |                       |                              |
|                | Pocytb-F2                 | CAATTCAGCCTTAGTTATATGGT      |                                                                                                                                                                                                                                     |                       |                              |
|                | Pocytb-R2                 | GAATATTCTCTAGCACCAATGCCA     |                                                                                                                                                                                                                                     |                       |                              |
| <i>Pocox1</i>  | Pocox1-F1                 | ATGCCCTGGATTATTGGAGGA        | The first PCR: 94 °C for 5 min; 94 °C for 1 min, 50 °C for 1 min, 70 °C for 2 min, 30 cycles; 70 °C 10 min.<br>The second PCR: 94 °C for 5 min; 94 °C for 50 sec, 55 °C for 50 sec, 70 °C for 2 min, 35 cycles; 70 °C 10 min.       | 861                   | FJ409571                     |
|                | Pocox1-R1                 | TCCTATAATGGCACCAATAG         |                                                                                                                                                                                                                                     |                       |                              |
|                | Pocox1-F2                 | TACCTATTTIATGTGGATCACC       |                                                                                                                                                                                                                                     |                       |                              |
|                | Pocox1-R2                 | CATGTAATGCTATATCAATAGCT      |                                                                                                                                                                                                                                     |                       |                              |
| <i>Pog3p</i>   | Pog3p-F1                  | GCAGGAATAATATTTTGTAAGGCACA   | The first PCR: 94 °C for 5 min; 94 °C for 1 min, 50 °C for 1 min, 70 °C for 2 min, 30 cycles; 70 °C 10 min.<br>The second PCR: 94 °C for 5 min; 94 °C for 50 sec, 55 °C for 50 sec, 70 °C for 2 min, 35 cycles; 70 °C 10 min.       | 359                   | KP050383                     |
|                | Pog3p-R1                  | GCATGTTACCGTTGGCGATAAGAA     |                                                                                                                                                                                                                                     |                       |                              |
|                | Pog3p-F2                  | CCTTAGATGGTCCATCAACTACTA     |                                                                                                                                                                                                                                     |                       |                              |
|                | Pog3p-R2                  | GTACACAGCGAGAAGGATCCAGCT     |                                                                                                                                                                                                                                     |                       |                              |
| <i>Pomsp1</i>  | PoMSP1-outerF1            | ATGAAGGTGTTTCGTATTGCGCTC     | The first PCR: 95 °C for 5 min; 95 °C for 30 sec, 62 °C for 5 min, 30 cycles; 72 °C 10 min.<br>The second PCR: 95 °C for 5 min; 95 °C for 40 sec; 62 °C for 1 min, 72 °C for 150 sec, 35 cycles; 72 °C 10 min.                      | 5157                  | FJ824670                     |
|                | PoMSP1-outerR1            | GGATCAATAAGACTGCCAATAAGA     |                                                                                                                                                                                                                                     |                       |                              |
|                | PoMSP1-innerF1            | GTTTCGTATTGCGCTCTCTTTTCAT    |                                                                                                                                                                                                                                     |                       |                              |
|                | PoMSP1-innerR1            | CTACATTAGATAAATGGTAAGGTAGA   |                                                                                                                                                                                                                                     |                       |                              |
|                | PoMSP1-innerF2            | CTACCTTACCATTATCTAATGTAGTA   |                                                                                                                                                                                                                                     |                       |                              |
|                | PoMSP1-innerR2            | CACAGTTTCCACTTTTGGGAAGCAA    |                                                                                                                                                                                                                                     |                       |                              |
|                | PoMSP1-innerF3            | CTTCCAAAAGTGGAAACTGTGGCT     |                                                                                                                                                                                                                                     |                       |                              |
| PoMSP1-innerR3 | GCCAATAAGAAAGATAAGCTAAGGA |                              |                                                                                                                                                                                                                                     |                       |                              |
| <i>Pmmsp1</i>  | PmMSP1-outerF             | GTCACCTGTGAAACAATGAAGAT      | The first PCR: 95 °C for 5 min; 95 °C for 40 sec, 55 °C for 1 min, 72 °C for 5 min, 30 cycles; 72 °C 10 min.<br>The second PCR: 95 °C for 5 min; 95 °C for 40 sec, 60 °C for 1 min, 72 °C for 2 min, 35 cycles; 72 °C 10 min.       | 5150-5160             | FJ824669                     |
|                | PmMSP1-outerR             | CCTCTTGCTCAGTCTTAATCCTT      |                                                                                                                                                                                                                                     |                       |                              |
|                | PmMSP1-innerF1            | GGAAAACCTGGAGGAAGTACTAGTTGT  |                                                                                                                                                                                                                                     |                       |                              |
|                | PmMSP1-innerR1            | GTCTTCTAAATACATAAGTTGCT      |                                                                                                                                                                                                                                     |                       |                              |
|                | PmMSP1-innerF2            | CTTGATAATAGCATTACAACAGAGA    |                                                                                                                                                                                                                                     |                       |                              |
|                | PmMSP1-innerR2            | GCTCACACTGTCATACATTGAA       |                                                                                                                                                                                                                                     |                       |                              |
|                | PmMSP1-innerF3            | GGAATCGTTGTTCCGACATTGT       |                                                                                                                                                                                                                                     |                       |                              |
|                | PmMSP1-innerR3            | GCATTATCCGGTTGCTCTTCT        |                                                                                                                                                                                                                                     |                       |                              |
|                | PmMSP1-innerF4            | CCTACTTATCTGGTGGATTACAT      |                                                                                                                                                                                                                                     |                       |                              |
| PmMSP1-innerR4 | CTCATTTTATGTTCAATCGTATCCT |                              |                                                                                                                                                                                                                                     |                       |                              |
| <i>Podhfr</i>  | Podhfr-outerF             | CGCGATATGCGCGTGTGCAAA        | The first PCR: 94 °C for 5 min; 94 °C for 40 s; 55 °C for 1 min; 72 °C for 120 sec, 30 cycles; 72 °C 10 min.<br>The second PCR: 94 °C for 5 min; 94 °C for 40 sec, 60 °C for 1 min, 72 °C for 120 sec, 35 cycles; 72 °C 10 min.     | 1673-1757             | EU266605                     |
|                | Podhfr-outerR             | CGTGGTGGACATAAATCTCTAT       |                                                                                                                                                                                                                                     |                       |                              |
|                | Podhfr-innerF             | GAGATTGGAAGAAGAGTGAATCGT     |                                                                                                                                                                                                                                     |                       |                              |
|                | Podhfr-innerR             | TTCCGGGTTTAGTTTAAAGCGTG      |                                                                                                                                                                                                                                     |                       |                              |
| <i>Pmdhfr</i>  | Pmdhfr-outerF             | ATGGAGGAAGTCTCAGACGTATTTCGAT | The first PCR: 94 °C for 5 min; 94 °C for 40 s; 55 °C for 1 min; 72 °C for 120 sec, 30 cycles; 72 °C 10 min.<br>The second PCR: 94 °C for 5 min; 94 °C for 40 sec, 60 °C for 1 min, 72 °C for 120 sec, 35 cycles; 72 °C 10 min.     | 1685-1779             | EF188271                     |
|                | Pmdhfr-outerR             | TAGGCGGCCATATCCATTGTTA       |                                                                                                                                                                                                                                     |                       |                              |
|                | Pmdhfr-innerF             | CATCTGCGCTTGCTGTAAAGTGCCA    |                                                                                                                                                                                                                                     |                       |                              |
|                | Pmdhfr-innerR             | GTAATAATCCGATATGTAAAGTCTTCA  |                                                                                                                                                                                                                                     |                       |                              |
| <i>Pmdhps</i>  | Pmdhps-outerF             | ATACCTAATTATAAACATATTG       | The first PCR: 94 °C for 5 min; 94 °C for 30 sec, 45 °C for 45 sec, 70 °C for 120 sec, 30 cycles; 72 °C 10 min.<br>The second PCR: 94 °C for 5 min; 94 °C for 30 sec, 52 °C for 45 sec, 72 °C for 120 sec, 35 cycles; 72 °C 10 min. | 962                   | KJ400020                     |
|                | Pmdhps-outerR             | ACCACATATAATTTTCTGTATAT      |                                                                                                                                                                                                                                     |                       |                              |
|                | Pmdhps-innerF             | GATACGATAAACACATTGTATT       |                                                                                                                                                                                                                                     |                       |                              |
|                | Pmdhps-innerR;            | TGGTCTTTATCCTTGCGCAT         |                                                                                                                                                                                                                                     |                       |                              |
