# Supplementary material for: Plasmodium malariae and Plasmodium ovale infections in the China–Myanmar border area
Source: PubMed Central journal article supplement (PMC5111346; doi:10.1186/s12936-016-1605-y), 2016-11-15
Supplement: 12936_2016_1605_MOESM2_ESM.pdf [file 12936_2016_1605_MOESM2_ESM.pdf]

## Additional file 2. GenBank accession number of the orthologous sequences

| <b>Genes</b>                   | <b>GenBank accession No. (Isolate)</b>                               |                                                      |                                   |                |
|--------------------------------|----------------------------------------------------------------------|------------------------------------------------------|-----------------------------------|----------------|
| <i>P. falciparum</i> SSU rRNA  | M19172 (in asexual parasites)                                        |                                                      | M19173 (not in asexual parasites) |                |
| <i>P. vivax</i> SSU rRNA       | X13926                                                               |                                                      | U03079 (Sal 1)                    |                |
| <i>P. malariae</i> SSU rRNA    | AF487999 (type 1)                                                    | AF488000 (type 2)                                    | KJ619942 (KOY13)                  | AF145336       |
|                                | AB489195 (Takaboh)                                                   | AB489196 (Oumu)                                      | KJ619943 (OCA24)                  | KM016331       |
|                                | M54897, KJ619943-KJ619947 (VEN01-VEN04), KJ934251-KJ934253 (CR1-CR4) |                                                      |                                   |                |
| <i>P. brasilianum</i> SSU rRNA | KJ619941 (HA12)                                                      | KT266778 (Peruvian)                                  | AF130735                          |                |
| <i>P. knowlesi</i> SSU rRNA    | FJ619089 (LT20-C4)                                                   | L07560                                               |                                   |                |
| <i>P. ovale</i> spp. SSU rRNA  | KF536875 ( <i>Pow</i> : PoW4)                                        | KF018654 (ZBP-HN clone RH1)                          |                                   |                |
|                                | KF536876 ( <i>Pow</i> : PoW6)                                        | KF018655 (ZBP-HN clone RH2)                          |                                   |                |
|                                | KF192072 (MAL-1)                                                     | KF018662 (ZBP-HN clone BZ-5H2)                       |                                   |                |
|                                | KF192073 (MAL-2)                                                     | KF219563 ( <i>Pow</i> clone 5SH5)                    |                                   |                |
|                                | KF696359 ( <i>Pow</i> clone GC-1)                                    | KF219564 ( <i>Pow</i> clone 5SH8)                    |                                   |                |
|                                | KF696360 ( <i>Pow</i> clone GC-2)                                    | KF696369-KF696377 ( <i>Poc</i> clone DC-1 to DC-10)  |                                   |                |
|                                | KJ786425 ( <i>Pow</i> FJ11)                                          | KF219558-KF219561 ( <i>Pow</i> clone RSH1, 2, 8, 10) |                                   |                |
|                                | KJ871671 ( <i>Poc</i> , FJX4)                                        | AB182489-AB182490 (Classic type 1-2)                 |                                   |                |
|                                | KJ871673 ( <i>Poc</i> , FJX22)                                       | AB182491-AB182493 (Variant type 1-3)                 |                                   |                |
|                                | AF145337 L48987                                                      | L48986 (clone 26)                                    |                                   |                |
| <i>Pocytb</i> SSU rRNA         | KP050427 (Po2003)                                                    | GU723537(UKMRL08)                                    | HQ712052                          |                |
|                                | KP050428 (Po2006)                                                    | GU723534(UKMRL34)                                    | FJ409567                          |                |
| <i>Pocox1</i> SSU rRNA         | KP050416 (Po2003)                                                    | JF894415 (PoC15)                                     | HQ712052                          | FJ409571       |
|                                | KP050417 (Po2006)                                                    | JF894419 (PoW1)                                      | ( <i>Poc</i> )                    |                |
| <i>Pog3p</i> SSU rRNA          | KP050383 (Po2003)                                                    | GU723549 (UKMRL01)                                   |                                   |                |
|                                | KP050384 (Po2006)                                                    | GU723571(UKMRL02)                                    |                                   |                |
| <i>P. malariae</i> MSP-1       | FJ824669 (Cameroon isolate MMA1)                                     |                                                      |                                   |                |
|                                | Brazilian isolates:                                                  |                                                      |                                   |                |
|                                | KR072269-KR072279 (fragment 1)                                       | JX045643-JX045645 (fragment 2)                       |                                   |                |
|                                | KR072215-KR072220 (fragment 2)                                       | KR072254-KR072263 (fragment 3)                       |                                   |                |
|                                | KR072239-KR072248 (fragment 4)                                       | KR072223 -KR072233 (fragment 5)                      |                                   |                |
| <i>P. ovale</i> spp. MSP-1     | KC137340-KC137349 (Thailand isolates PO-1 to PO-10)                  |                                                      |                                   |                |
|                                | FJ824670 (Cameroon OMIA)                                             | FJ824671 (Cameroon OM1B)                             |                                   |                |
| <i>P. falciparum</i> dhfr-ts   | XM_001351443 (3D7)                                                   | KI926308 (Tanzania 2000708)                          |                                   |                |
| <i>P. vivax</i> dhfr-ts        | XM_001615032 (SAI-1)                                                 |                                                      |                                   |                |
| <i>P. malariae</i> dhfr-ts     | AY846633 (Thai isolate)                                              | EF188271 (Pm3)                                       | EF188272 (Te)                     | EF188273 (Tu)  |
|                                | AY846634 (Laos isolate)                                              | EF198109 (Ch)                                        | EF198110 (N)                      | EF198111 (O)   |
| <i>P. ovale</i> spp. dhfr-ts   | KP050405 (Po2003)                                                    | KP050411 (Po2013-1)                                  | EU266605 (Po4)                    |                |
|                                | KP050406 (Po2006)                                                    | KP050412 (Po2013-2)                                  | EU266606 (Po3)                    |                |
|                                | EU266608 (17w)                                                       | EU266609 (Po18)                                      | EU266607 (Po4/2)                  |                |
|                                | EU266610 (Po19)                                                      | KP050407-KP050410 (Po2012-1 to Po2012-4)             |                                   |                |
| <i>P. falciparum</i> dhps      | XM_001349382 (3D7)                                                   | KI926388 (Tanzania 2000708)                          |                                   |                |
| <i>P. vivax</i> dhps           | XM_001617159 (SAI-1)                                                 |                                                      |                                   |                |
| <i>P. malariae</i> dhps        | KJ400020 (PmS)                                                       | KJ400022 (YA)                                        | KJ400023 (Av427)                  | KJ400024 (Pm5) |
|                                | KJ400025(AV1373)                                                     | KJ400026 (L138)                                      | KJ400027 (T4)                     | KJ400028 (W13) |
