# Supplementary material for: Plasmodium malariae and Plasmodium ovale infections in the China–Myanmar border area
Source: PubMed Central journal article supplement (PMC5111346; doi:10.1186/s12936-016-1605-y), 2016-11-15
Supplement: 12936_2016_1605_MOESM3_ESM.pdf [file 12936_2016_1605_MOESM3_ESM.pdf]

**Additional file 3 Discrepancies in diagnosis between microscopy and PCR**

| <b>Microscopy</b>  | Pv | Pf | Pm | Pv | Pf | Pv | Mixed |    |
|--------------------|----|----|----|----|----|----|-------|----|
| <b>PCR</b>         | Pf | Pv | Pv | Pm | -  | -  | Pf    | Pv |
| <b>Case Number</b> | 3  | 4  | 1  | 1  | 1  | 5  | 22    | 4  |
