# Supplementary material for: Plasmodium malariae and Plasmodium ovale infections in the China–Myanmar border area
Source: PubMed Central journal article supplement (PMC5111346; doi:10.1186/s12936-016-1605-y), 2016-11-15
Supplement: 12936_2016_1605_MOESM4_ESM.pdf [file 12936_2016_1605_MOESM4_ESM.pdf]

## Additional file 4. Sequence identity between the *PmMSP-1* sequences

### A. Nucleotide identity

|          | Cameroonian isolate | Brazilian isolates   |                          |                          |                      |                      |
|----------|---------------------|----------------------|--------------------------|--------------------------|----------------------|----------------------|
|          | MM1A<br>5256 bp     | fragment 1<br>533 bp | Fragment 2<br>657-675 bp | fragment 3<br>656-680 bp | fragment 4<br>443 bp | fragment 5<br>631 bp |
| M0N00290 | 98.29               | 96.62-97.56          | 87.42-88.89              | 99.54-99.85              | 99.77                | 99.37-99.68          |
| M0N00556 | 98.22               | 96.62-97.56          | 87.26-88.72              | 99.39-99.71              | 99.77                | 99.37-99.68          |
| M0N00648 | 98.30               | 96.62-97.56          | 87.42-88.89              | 99.54-99.85              | 99.77                | 99.37-99.68          |

### B. Amino acid identity

|          | Cameroonian isolate | Brazilian isolates   |                          |                          |                      |                      |
|----------|---------------------|----------------------|--------------------------|--------------------------|----------------------|----------------------|
|          | MM1A<br>1751 aa     | fragment 1<br>177 aa | fragment 2<br>219-225 aa | fragment 3<br>218-226 aa | fragment 4<br>147 aa | fragment 5<br>210 aa |
| M0N00290 | 97.06               | 90.96-93.79          | 82.27-83.58              | 98.62-99.56              | 100                  | 98.10-99.05          |
| M0N00556 | 97.00               | 90.96-93.79          | 82.27-83.58              | 98.62-99.56              | 100                  | 98.10-99.05          |
| M0N00648 | 97.07               | 90.96-93.79          | 82.27-83.58              | 98.62-99.56              | 100                  | 98.10-99.05          |
