# Supplementary material for: Plasmodium malariae and Plasmodium ovale infections in the China–Myanmar border area
Source: PubMed Central journal article supplement (PMC5111346; doi:10.1186/s12936-016-1605-y), 2016-11-15
Supplement: 12936_2016_1605_MOESM5_ESM.pdf [file 12936_2016_1605_MOESM5_ESM.pdf]

## Additional file 5. Sequence identity between the *PoMSP-1* sequences

### A. Nucleotide identity

|          | Identities (%)    |                 |                                   |                                          |
|----------|-------------------|-----------------|-----------------------------------|------------------------------------------|
|          | Cameroon isolates |                 | Thailand isolates                 |                                          |
|          | OM1A<br>5256 bp   | OM1B<br>5159 bp | <i>P. ovale curtisi</i><br>5181bp | <i>P. ovale wallikeri</i><br>5016-5043bp |
| C0100511 | 98.42             | 99.22           | 99.65-99.94                       | 91.00-91.17                              |
| M0500214 | 98.48             | 99.28           | 99.71-100                         | 91.02-91.19                              |

### B. Amino acid identity

|          | Identities %      |                |                                   |                                          |
|----------|-------------------|----------------|-----------------------------------|------------------------------------------|
|          | Cameroon isolates |                | Thailand isolates                 |                                          |
|          | OM1A<br>1730aa    | OM1B<br>1718aa | <i>P. ovale curtisi</i><br>1727aa | <i>P. ovale wallikeri</i><br>1672-1681aa |
| C0100511 | 96.71             | 98.18          | 99.30-99.94                       | 86.02-86.37                              |
| M0500214 | 96.77             | 98..24         | 99.36-100                         | 86.08-86.43                              |
