# Supplementary material for: Plasmodium malariae and Plasmodium ovale infections in the China–Myanmar border area
Source: PubMed Central journal article supplement (PMC5111346; doi:10.1186/s12936-016-1605-y), 2016-11-15

**Additional file 6. Alignment of PoMSP1 sequences.**

**(A)** Nucleotide substitutions and the 12-nucleotide repeat region of *PoMSP-1* (numbering based on the sequence of the *PoMSP-1* from the Thai isolate Po-7). \*GenBank accession numbers: KX672045 (C0100511), KX672044 (M0500214); Cameroon (CM) isolates: FJ824670 and FJ824671; Thailand (TH) isolates: KC137340-KC137341, KC137343-KC137346 and KC137349.

**A.**

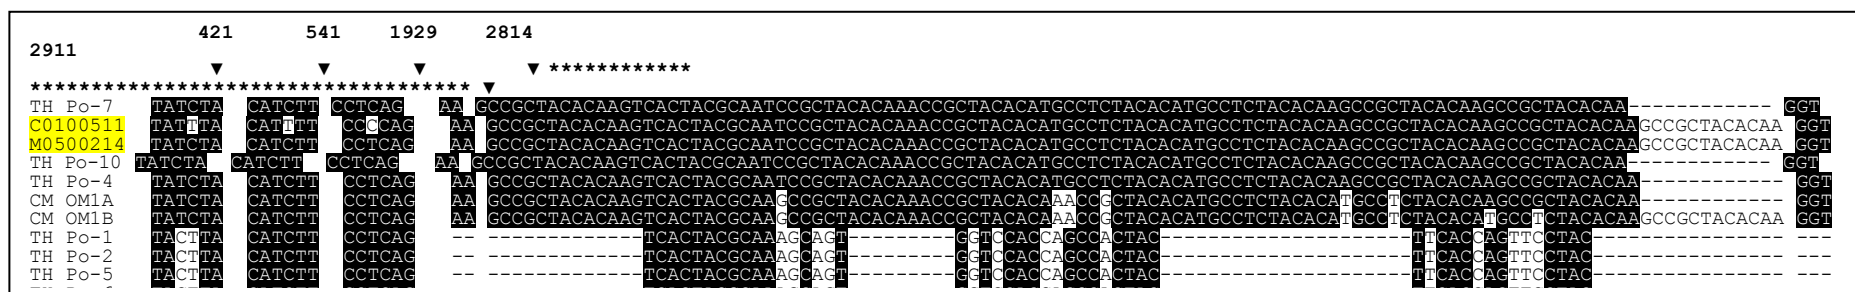

**(B)** Amino acid polymorphisms in the variable domains of PoMSP-1. Protein sequence numbering was based on the sequence of the PoMSP-1 from the Thai isolate Po-7. \*GenBank accession numbers: KX672045 (C0100511), KX672044 (M0500214); Cameroon (CM) isolates: FJ824670 and FJ824671; Thailand (TH) isolates: KC137340-KC137341, KC137343-KC137346 and KC137349.

B.

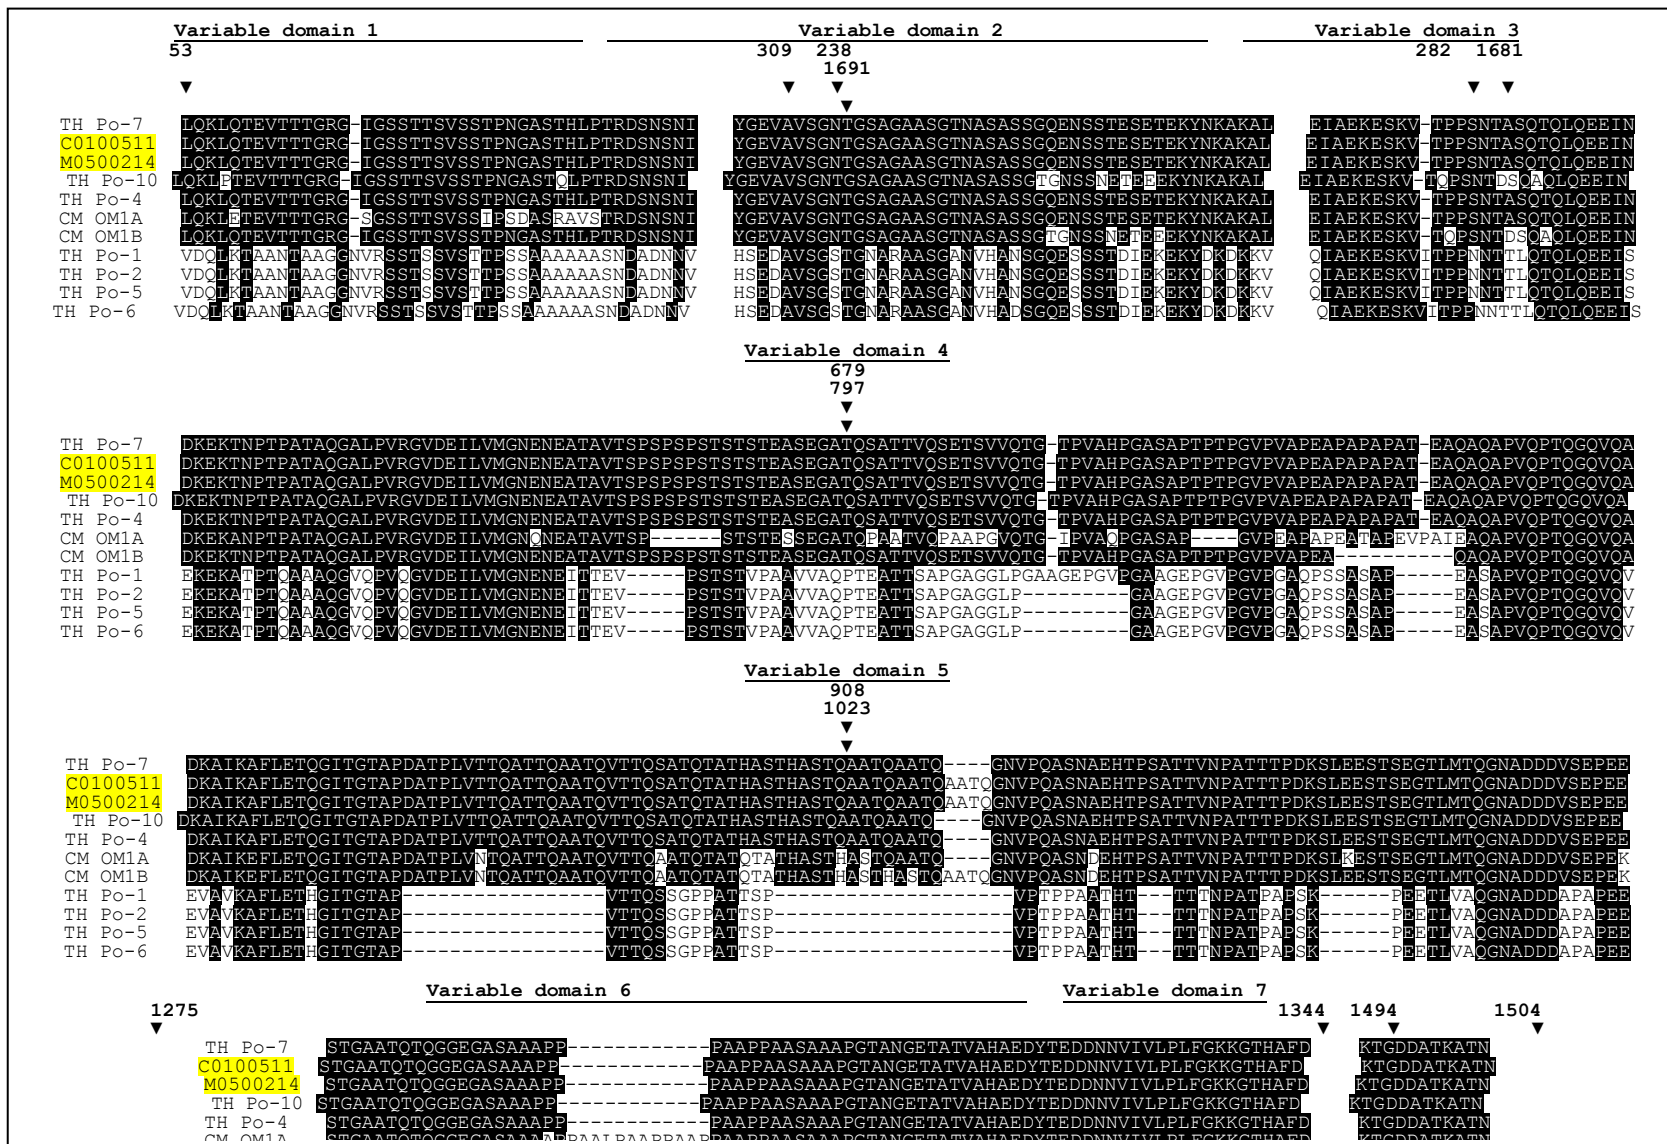

Supplement: 12936_2016_1605_MOESM6_ESM.pdf [file 12936_2016_1605_MOESM6_ESM.pdf]
