# Supplementary material for: Plasmodium malariae and Plasmodium ovale infections in the China–Myanmar border area
Source: PubMed Central journal article supplement (PMC5111346; doi:10.1186/s12936-016-1605-y), 2016-11-15
Supplement: 12936_2016_1605_MOESM7_ESM.pdf [file 12936_2016_1605_MOESM7_ESM.pdf]

**Additional file 7. Alignment of amino acid sequences of PmDHF<sub>R</sub>-TS (A) and PoDHF<sub>R</sub>-TS (B) from the China-Myanmar border area and other countries**

**A.**

|               |  |                                                |                                  |                               |                                            |                    |
|---------------|--|------------------------------------------------|----------------------------------|-------------------------------|--------------------------------------------|--------------------|
|               |  | 16                                             | 50                               | 51                            | 59                                         |                    |
| Pf 3D7        |  | MMEQVCDVFDIYAIACACCKVESKNEGKKNVEFNNTFRGLGNKGVL | PWKNSLDMKYFCAV                   | TTVYVNESKYEK                  | KLKYRCKYLNKETVDNVN                         | -----DMPNSKK [ 97] |
| Pf TZ 2000708 |  | MMEQVCDVFDIYAIACACCKVESKNEGKKNVEFNNTFRGLGNKGVL | PWKNSLDMKYFCAV                   | TTVYVNESKYEK                  | KLKYRCKYLNKETVDNVN                         | -----DMPNSKK [ 97] |
| Pm TH Pm3     |  | M-E-EVSDVFDIYAIACACCKVPNQGEGKKNEIFSTKTFRGLGNKG | CLPWKNSLDMKYFSSV                 | TTYVNEMKYK                    | KLKYRCKYLKEISNENSSTVFENISLLSSSK [ 103]     |                    |
| Pm TH Te      |  | M-E-EVSDVFDIYAIACACCKVPNQGEGKKNEIFSTKTFRGLGNKG | CLPWKNSLDMKYFSSV                 | TTYVNEMKYK                    | KLKYRCKYLKEISNENSSTVFENISLLSSSK [ 103]     |                    |
| Pm TH Tu      |  | M-E-EVSDVFDIYAIACACCKVPNQGEGKKNEIFSTKTFRGLGNKG | CLPWKNSLDMKYFSSV                 | TTYVNEMKYK                    | KLKYRCKYLKEISNENSSTVFENISLLSSSK [ 103]     |                    |
| C0400117      |  | -----NEIFSTKTFRGLGNKG                          | CLPWKNSLDMKYFSSV                 | TTYVNEMKYK                    | KLKYRCKYLKEISNENSSTVFENISLLSSSK [ 76]      |                    |
| MON00290      |  | -----IFSTKTFRGLGNKG                            | CLPWKNSLDMKYFSSV                 | TTYVNEMKYK                    | KLKYRCKYLKEISNENSSTVFENISLLSSSK [ 74]      |                    |
| MON00556      |  | -----ICACCKVPNQGEGKKNEIFSTKTFRGLGNKG           | CLPWKNSLDMKYFSSV                 | TTYVNEMKYK                    | KLKYRCKYLKEISNENSSTVFENISLLSSSK [ 91]      |                    |
| MON00648      |  | -----ICACCKVPNQGEGKKNEIFSTKTFRGLGNKG           | CLPWKNSLDMKYFSSV                 | TTYVNEMKYK                    | KLKYRCKYLKEISNENSSTVFENISLLSSSK [ 91]      |                    |
|               |  | 108                                            |                                  | 164                           |                                            |                    |
| Pf 3D7        |  | LQNVMVGRTSWESIPKFKPLSNRINVL                    | SRTLKKEDFDEDVYIINKVEDLIVL        | LGKLNYYKCFIIGGSVVYQEFLEK      | KLIKIKYFTRINSTYECDFVFPPEIN [ 201]          |                    |
| Pf TZ 2000708 |  | LQNVMVGRTSWESIPKFKPLSNRINVL                    | SRTLKKEDFDEDVYIINKVEDLIVL        | LGKLNYYKCFIIGGSVVYQEFLEK      | KLIKIKYFTRINSTYECDFVFPPEIN [ 201]          |                    |
| Pm TH Pm3     |  | LQNVMVGRSSWVSI                                 | PKQYKPLPNRINNVLSRTLKKEDVKEDIF    | IINMMDQVLVLLKLNYYKCFIIGGATVYK | CLERNLIKQIYFTRINNVYECDFVFPPEID [ 207]      |                    |
| Pm TH Te      |  | LQNVMVGRSSWVSI                                 | PKQYKPLPNRINNVLSRTLKKEDVKEDIF    | IINMMDQVLVLLKLNYYKCFIIGGATVYK | CLERNLIKQIYFTRINNVYECDFVFPPEID [ 207]      |                    |
| Pm TH Tu      |  | LQNVMVGRSSWVSI                                 | PKQYKPLPNRINNVLSRTLKKEDVKEDIF    | IINMMDQVLVLLKLNYYKCFIIGGATVYK | CLERNLIKQIYFTRINNVYECDFVFPPEID [ 207]      |                    |
| C0400117      |  | LQNVMVGRSSWVSI                                 | PKQYKPLPNRINNVLSRTLKKEDVKEDIF    | IINMMDQVLVLLKLNYYKCFIIGGATVYK | CLERNLIKQIYFTRINNVYECDFVFPPEID [ 180]      |                    |
| MON00290      |  | LQNVMVGRSSWVSI                                 | PKQYKPLPNRINNVLSRTLKKEDVKEDIF    | IINMMDQVLVLLKLNYYKCFIIGGATVYK | CLERNLIKQIYFTRINNVYECDFVFPPEID [ 178]      |                    |
| MON00556      |  | LQNVMVGRSSWVSI                                 | PKQYKPLPNRINNVLSRTLKKEDVKEDIF    | IINMMDQVLVLLKLNYYKCFIIGGATVYK | CLERNLIKQIYFTRINNVYECDFVFPPEID [ 195]      |                    |
| MON00648      |  | LQNVMVGRSSWVSI                                 | PKQYKPLPNRINNVLSRTLKKEDVKEDIF    | IINMMDQVLVLLKLNYYKCFIIGGATVYK | CLERNLIKQIYFTRINNVYECDFVFPPEID [ 195]      |                    |
| Pf 3D7        |  | ENEYQIISVSDVYTSNNTLDFI                         | IYKKTNNKMLNE----ONCIKGE          | EKNNDMPLKNDKDTCHMKKLETFYK     | NVDK---YKINYENDDDDEEDDFVYFNFNK [ 297]      |                    |
| Pf TZ 2000708 |  | ENEYQIISVSDVYTSNNTLDFI                         | IYKKTNNKMLNE----ONCIKGE          | EKNNDMPLKNDKDTCHMKKLETFYK     | NVDK---YKINYENDDDDEEDDFVYFNFNK [ 297]      |                    |
| Pm TH Pm3     |  | ENVFOIISVSDVYTSNCTSLDFV                        | IFSKRKKALTOBSLPHOSSGSDKGSNTSSTIS | NGAMSSNTIRGSTSSSGKGGGESIFER   | YNFMGDEEDDLVYFNFNN [ 311]                  |                    |
| Pm TH Te      |  | ENVFOIISVSDVYTSNCTSLDFV                        | IFSKRKKALTOBSLPHOSSGSDKGSNTSSTIS | NGAMSSNTIRGSTSSSGKGGGESIFER   | YNFMGDEEDDLVYFNFNN [ 311]                  |                    |
| Pm TH Tu      |  | ENVFOIISVSDVYTSNCTSLDFV                        | IFSKRKKALTOBSLPHOSSGSDKGSNTSSTIS | NGAMSSNTIRGSTSSSGKGGGESIFER   | YNFMGDEEDDLVYFNFNN [ 311]                  |                    |
| C0400117      |  | ENVFOIISVSDVYTSNCTSLDFV                        | IFSKRKKALTOBSLPHOSSGSDKGSNTSSTIS | NGAMSSNTIRGSTSSSGKGGGESIFER   | YNFMGDEEDDLVYFNFNN [ 284]                  |                    |
| MON00290      |  | ENVFOIISVSDVYTSNCTSLDFV                        | IFSKRKKALTOBSLPHOSSGSDKGSNTSSTIS | NGAMSSNTIRGSTSSSGKGGGESIFER   | YNFMGDEEDDLVYFNFNN [ 282]                  |                    |
| MON00556      |  | ENVFOIISVSDVYTSNCTSLDFV                        | IFSKRKKALTOBSLPHOSSGSDKGSNTSSTIS | NGAMSSNTIRGSTSSSGKGGGESIFER   | YNFMGDEEDDLVYFNFNN [ 299]                  |                    |
| MON00648      |  | ENVFOIISVSDVYTSNCTSLDFV                        | IFSKRKKALTOBSLPHOSSGSDKGSNTSSTIS | NGAMSSNTIRGSTSSSGKGGGESIFER   | YNFMGDEEDDLVYFNFNN [ 299]                  |                    |
| Pf 3D7        |  | EKEEKKNKSIHPNDFQIYNSLKYKYHPEYQYLSIIYDI         | IMNGNKQNDRTG                     | VGVLKSKFGYIMKENL              | NOYFPLLTTKKFLRGIIEELLWFRGE                 | TNGNTLLNKNV [ 401] |
| Pf TZ 2000708 |  | EKEEKKNKSIHPNDFQIYNSLKYKYHPEYQYLSIIYDI         | IMNGNKQNDRTG                     | VGVLKSKFGYIMKENL              | NOYFPLLTTKKFLRGIIEELLWFRGE                 | TNGNTLLNKNV [ 401] |
| Pm TH Pm3     |  | NKNE-YKNAENANDEK                               | IYNSLKEKHHP                      | PEYQYLSIIYDIIMNGNKQNDRTG      | VGVLKSKFGYIMKENLNOYFPLLTTKKFLRGIIEELLWFRGE | TNGNTLLNKNV [ 414] |
| Pm TH Te      |  | NKNE-YKNAENANDEK                               | IYNSLKEKHHP                      | PEYQYLSIIYDIIMNGNKQNDRTG      | VGVLKSKFGYIMKENLNOYFPLLTTKKFLRGIIEELLWFRGE | TNGNTLLNKNV [ 414] |
| Pm TH Tu      |  | NKNE-YKNAENANDEK                               | IYNSLKEKHHP                      | PEYQYLSIIYDIIMNGNKQNDRTG      | VGVLKSKFGYIMKENLNOYFPLLTTKKFLRGIIEELLWFRGE | TNGNTLLNKNV [ 414] |
| C0400117      |  | NKNE-YKNAENANDEK                               | IYNSLKEKHHP                      | PEYQYLSIIYDIIMNGNKQNDRTG      | VGVLKSKFGYIMKENLNOYFPLLTTKKFLRGIIEELLWFRGE | TNGNTLLNKNV [ 387] |
| MON00290      |  | NKNE-YKNAENANDEK                               | IYNSLKEKHHP                      | PEYQYLSIIYDIIMNGNKQNDRTG      | VGVLKSKFGYIMKENLNOYFPLLTTKKFLRGIIEELLWFRGE | TNGNTLLNKNV [ 385] |
| MON00556      |  | NKNE-YKNAENANDEK                               | IYNSLKEKHHP                      | PEYQYLSIIYDIIMNGNKQNDRTG      | VGVLKSKFGYIMKENLNOYFPLLTTKKFLRGIIEELLWFRGE | TNGNTLLNKNV [ 402] |
| MON00648      |  | NKNE-YKNAENANDEK                               | IYNSLKEKHHP                      | PEYQYLSIIYDIIMNGNKQNDRTG      | VGVLKSKFGYIMKENLNOYFPLLTTKKFLRGIIEELLWFRGE | TNGNTLLNKNV [ 402] |
| Pf 3D7        |  | RIWEANGTREFLDNRKLFHREVNDLGP                    | IYGFQWRHFGA                      | EYTNMHNANYEDKGV               | DQLNKIHLIKNDP                              | TSRRILLCAWNVKDL    |
| Pf TZ 2000708 |  | RIWEANGTREFLDNRKLFHREVNDLGP                    | IYGFQWRHFGA                      | EYTNMHNANYEDKGV               | DQLNKIHLIKNDP                              | TSRRILLCAWNVKDL    |
| Pm TH Pm3     |  | RIWEANGTREFLDNRKLFHREVNDLGP                    | IYGFQWRHFGA                      | EYTNMHNANYEDKGV               | DQLNKIHLIKNDP                              | TSRRILLCAWNVKDL    |
| Pm TH Te      |  | RIWEANGTREFLDNRKLFHREVNDLGP                    | IYGFQWRHFGA                      | EYTNMHNANYEDKGV               | DQLNKIHLIKNDP                              | TSRRILLCAWNVKDL    |
| Pm TH Tu      |  | RIWEANGTREFLDNRKLFHREVNDLGP                    | IYGFQWRHFGA                      | EYTNMHNANYEDKGV               | DQLNKIHLIKNDP                              | TSRRILLCAWNVKDL    |
| C0400117      |  | RIWEANGTREFLDNRKLFHREVNDLGP                    | IYGFQWRHFGA                      | EYTNMHNANYEDKGV               | DQLNKIHLIKNDP                              | TSRRILLCAWNVKDL    |
| MON00290      |  | RIWEANGTREFLDNRKLFHREVNDLGP                    | IYGFQWRHFGA                      | EYTNMHNANYEDKGV               | DQLNKIHLIKNDP                              | TSRRILLCAWNVKDL    |
| MON00556      |  | RIWEANGTREFLDNRKLFHREVNDLGP                    | IYGFQWRHFGA                      | EYTNMHNANYEDKGV               | DQLNKIHLIKNDP                              | TSRRILLCAWNVKDL    |
| MON00648      |  | RIWEANGTREFLDNRKLFHREVNDLGP                    | IYGFQWRHFGA                      | EYTNMHNANYEDKGV               | DQLNKIHLIKNDP                              | TSRRILLCAWNVKDL    |
| Pf 3D7        |  | IMYQRSCDLGLGVPFNIA                             | SYSIPTHMIAQVCN                   | LQPAQFIHLGN                   | AHVYNNHIDSLKVLNRI                          | YPFPPTLKNPDIKNI    |
| Pf TZ 2000708 |  | IMYQRSCDLGLGVPFNIA                             | SYSIPTHMIAQVCN                   | LQPAQFIHLGN                   | AHVYNNHIDSLKVLNRI                          | YPFPPTLKNPDIKNI    |
| Pm TH Pm3     |  | IMYQRSCDLGLGVPFNIA                             | SYSIPTHMIAQVCN                   | LQPAQFIHLGN                   | AHVYNNHIDSLKVLNRI                          | YPFPPTLKNPDIKNI    |
| Pm TH Te      |  | IMYQRSCDLGLGVPFNIA                             | SYSIPTHMIAQVCN                   | LQPAQFIHLGN                   | AHVYNNHIDSLKVLNRI                          | YPFPPTLKNPDIKNI    |
| Pm TH Tu      |  | IMYQRSCDLGLGVPFNIA                             | SYSIPTHMIAQVCN                   | LQPAQFIHLGN                   | AHVYNNHIDSLKVLNRI                          | YPFPPTLKNPDIKNI    |
| C0400117      |  | IMYQRSCDLGLGVPFNIA                             | SYSIPTHMIAQVCN                   | LQPAQFIHLGN                   | AHVYNNHIDSLKVLNRI                          | YPFPPTLKNPDIKNI    |
| MON00290      |  | IMYQRSCDLGLGVPFNIA                             | SYSIPTHMIAQVCN                   | LQPAQFIHLGN                   | AHVYNNHIDSLKVLNRI                          | YPFPPTLKNPDIKNI    |
| MON00556      |  | IMYQRSCDLGLGVPFNIA                             | SYSIPTHMIAQVCN                   | LQPAQFIHLGN                   | AHVYNNHIDSLKVLNRI                          | YPFPPTLKNPDIKNI    |
| MON00648      |  | IMYQRSCDLGLGVPFNIA                             | SYSIPTHMIAQVCN                   | LQPAQFIHLGN                   | AHVYNNHIDSLKVLNRI                          | YPFPPTLKNPDIKNI    |

\* **GenBank accession numbers:** Isolates of China-Myanmar border: KX672033 (C0400117), KX672034 (MON00556), KX672035 (MON00648), KX672036 (MON00290); Pf: XM\_001351443 and KI926308 (Tanzania, TZ 2000708); Thailand (TH) isolates: EF188271 (Pm3), EF188272 (Te) and EF188273 (Tu).

**B.**

|                 |                                                                                                                  |       |    |       |
|-----------------|------------------------------------------------------------------------------------------------------------------|-------|----|-------|
|                 | 16                                                                                                               | 50 51 | 59 |       |
| Pf 3D7          | MMEQVCDVFDIYAICACCKVESKNEGKKNVFNNTFRGLGNKGVLPWKCNSLDMKYFCAVTTYVNESKEYEKLKYRCKYLNKET-----VDNVNDMPNSKKLQNVV        |       |    | [102] |
| Pf TZ 2000708   | MMEQVCDVFDIYAICACCKVESKNEGKKNVFNNTFRGLGNKGVLPWKCNSLDMKYFCAVTTYVNESKEYEKLKYRCKYLNKET-----VDNVNDMPNSKKLQNVV        |       |    | [102] |
| Pow UG Po2012-3 | M-EVCEVFDIYAICACCKVSKEGDWKKSSESSSTFRGCGNKGILPWKCNVSDISYFSSVTTYVNEWNYKLLKYKREKYLEKDSNDKKKVDVINIAPTSSKKLQNVV       |       |    | [107] |
| Pow NG Po2006   | M-EVCEVFDIYAICACCKVSKEGDWKKSSESSSTFRGCGNKGILPWKCNVSDISYFSSVTTYVNEWNYKLLKYKREKYLEKDSNDKKKVDVINIAPTSSKKLQNVV       |       |    | [107] |
| Poc IN Po2003   | M-EVCEVFDIYAICACCKVSKEGDWKKSSESSSTFRGCGNKGILPWKCNVSDISYFSSVTTYVNEWNYKLLKYKREKYLEKDSNDKKKVDVINIAPTSSKKLQNVV       |       |    | [107] |
| Poc ID Po2012-2 | M-EVCEVFDIYAICACCKVSKEGDWKKSSESSSTFRGCGNKGILPWKCNVSDISYFSSVTTYVNEWNYKLLKYKREKYLEKDSNDKKKVDVINIAPTSSKKLQNVV       |       |    | [107] |
| M0500214        | -----STFRGCGNKGILPWKCNVSDISYFSSVTTYVNEWNYKLLKYKREKYLEKDSNDKKKVDVINIAPTSSKKLQNVV                                  |       |    | [ 74] |
| C0100511        | -----STFRGCGNKGILPWKCNVSDISYFSSVTTYVNEWNYKLLKYKREKYLEKDSNDKKKVDVINIAPTSSKKLQNVV                                  |       |    | [ 74] |
| M0102751        | -----DWKKSSESSSTFRGCGNKGILPWKCNVSDISYFSSVTTYVNEWNYKLLKYKREKYLEKDSNDKKKVDVINIAPTSSKKLQNVV                         |       |    | [ 84] |
|                 | 108                                                                                                              | 164   |    |       |
| Pf 3D7          | VMGRSWSWESIPKPKFPLSNRINVLRSRTLLKKEDFDEDVYIINKVEDLIVLLGKLNYYKCFIIGGSVVYQEFLEKLLIKKIYFTRINSTYECVDFVFPPEINENEYQIISV |       |    | [210] |
| Pf TZ 2000708   | VMGRSWSWESIPKPKFPLSNRINVLRSRTLLKKEDFDEDVYIINKVEDLIVLLGKLNYYKCFIIGGSVVYQEFLEKLLIKKIYFTRINSTYECVDFVFPPEINENEYQIISV |       |    | [210] |
| Pow UG Po2012-3 | VMGRSWSWESIPKPKFPLSNRINVLRSRTLLKKEDFDEDVYIINKVEDLIVLLGKLNYYKCFIIGGSVVYQEFLEKLLIKKIYFTRINSTYECVDFVFPPEINENEYQIISV |       |    | [215] |
| Pow NG Po2006   | VMGRSWSWESIPKPKFPLSNRINVLRSRTLLKKEDFDEDVYIINKVEDLIVLLGKLNYYKCFIIGGSVVYQEFLEKLLIKKIYFTRINSTYECVDFVFPPEINENEYQIISV |       |    | [215] |
| Poc IN Po2003   | VMGRSWSWESIPKPKFPLSNRINVLRSRTLLKKEDFDEDVYIINKVEDLIVLLGKLNYYKCFIIGGSVVYQEFLEKLLIKKIYFTRINSTYECVDFVFPPEINENEYQIISV |       |    | [215] |
| Poc ID Po2012-2 | VMGRSWSWESIPKPKFPLSNRINVLRSRTLLKKEDFDEDVYIINKVEDLIVLLGKLNYYKCFIIGGSVVYQEFLEKLLIKKIYFTRINSTYECVDFVFPPEINENEYQIISV |       |    | [215] |
| M0500214        | VMGRSWSWESIPKPKFPLSNRINVLRSRTLLKKEDFDEDVYIINKVEDLIVLLGKLNYYKCFIIGGSVVYQEFLEKLLIKKIYFTRINSTYECVDFVFPPEINENEYQIISV |       |    | [182] |
| C0100511        | VMGRSWSWESIPKPKFPLSNRINVLRSRTLLKKEDFDEDVYIINKVEDLIVLLGKLNYYKCFIIGGSVVYQEFLEKLLIKKIYFTRINSTYECVDFVFPPEINENEYQIISV |       |    | [182] |
| M0102751        | VMGRSWSWESIPKPKFPLSNRINVLRSRTLLKKEDFDEDVYIINKVEDLIVLLGKLNYYKCFIIGGSVVYQEFLEKLLIKKIYFTRINSTYECVDFVFPPEINENEYQIISV |       |    | [192] |
| Pf 3D7          | SDVYTSNNTLDFIYKKTNNKMLNEQNCIRGEENK-----NDMPLKNDKDTCHMKKLETFYKNDVKYK-----INYNDDDDDEEDD                            |       |    | [289] |
| Pf TZ 2000708   | SDVYTSNNTLDFIYKKTNNKMLNEQNCIRGEENK-----NDMPLKNDKDTCHMKKLETFYKNDVKYK-----INYNDDDDDEEDD                            |       |    | [289] |
| Pow UG Po2012-3 | SEVYSSNCTTLDLFIYSRKKKDTQNDGDSSESTTT---TATATATWPGIAGDTSMNIAETSTTYASSHHGKSSKWWTKVCTKSGAEWVKNNMMLTSSQKDNVDEEDD      |       |    | [321] |
| Pow NG Po2006   | SEVYSSNCTTLDLFIYSRKKKDTQNDGDSSESTTT---TATATATWPGIAGDTSMNIAETSTTYASSHHGKSSKWWTKVCTKSGAEWVKNNMMLTSSQKDNVDEEDD      |       |    | [323] |
| Poc IN Po2003   | SEVYSSNCTTLDLFIYSRKKKDTQNDGDSSESTTT---TATATATWPGIAGDTSMNIAETSTTYASSHHGKSSKWWTKVCTKSGAEWVKNNMMLTSSQKDNVDEEDD      |       |    | [319] |
| Poc ID Po2012-2 | SEVYSSNCTTLDLFIYSRKKKDTQNDGDSSESTTT---TATATATWPGIAGDTSMNIAETSTTYASSHHGKSSKWWTKVCTKSGAEWVKNNMMLTSSQKDNVDEEDD      |       |    | [319] |
| M0500214        | SEVYSSNCTTLDLFIYSRKKKDTQNDGDSSESTTT---TATATATWPGIAGDTSMNIAETSTTYASSHHGKSSKWWTKVCTKSGAEWVKNNMMLTSSQKDNVDEEDD      |       |    | [286] |
| C0100511        | SEVYSSNCTTLDLFIYSRKKKDTQNDGDSSESTTT---TATATATWPGIAGDTSMNIAETSTTYASSHHGKSSKWWTKVCTKSGAEWVKNNMMLTSSQKDNVDEEDD      |       |    | [286] |
| M0102751        | SEVYSSNCTTLDLFIYSRKKKDTQNDGDSSESTTT---TATATATWPGIAGDTSMNIAETSTTYASSHHGKSSKWWTKVCTKSGAEWVKNNMMLTSSQKDNVDEEDD      |       |    | [296] |
| Pf 3D7          | FVYFNFNKEKEEKNKNSIHPNDFQIYNSLKYKYHPEYOYLNIIYDMMNGNKQSDRTGCVGLSKFGYIMKFDLSQYFPLLTTKKLFLRGIIEELLWFRIGETNGNTLL      |       |    | [397] |
| Pf TZ 2000708   | FVYFNFNKEKEEKNKNSIHPNDFQIYNSLKYKYHPEYOYLNIIYDMMNGNKQSDRTGCVGLSKFGYIMKFDLSQYFPLLTTKKLFLRGIIEELLWFRIGETNGNTLL      |       |    | [397] |
| Pow UG Po2012-3 | YMYFSFNKKK-KSQIMKNVDFEITYNITIKLKHPEYOYLNIIYDMMNGNKQSDRTGCVGLSKFGYIMKFDLSQYFPLLTTKKLFLRGIIEELLWFRIGETNGNTLL       |       |    | [428] |
| Pow NG Po2006   | YMYFSFNKKK-KSQIMKNVDFEITYNITIKLKHPEYOYLNIIYDMMNGNKQSDRTGCVGLSKFGYIMKFDLSQYFPLLTTKKLFLRGIIEELLWFRIGETNGNTLL       |       |    | [430] |
| Poc IN Po2003   | YMYFSFNKKK-KSQIGKNAEDFEITYNITIKLKHPEYOYLNIIYDMMNGNKQSDRTGCVGLSKFGYIMKFDLSQYFPLLTTKKLFLRGIIEELLWFRIGETNGNTLL      |       |    | [426] |
| Poc ID Po2012-2 | YMYFSFNKKK-KSQIGKNAEDFEITYNITIKLKHPEYOYLNIIYDMMNGNKQSDRTGCVGLSKFGYIMKFDLSQYFPLLTTKKLFLRGIIEELLWFRIGETNGNTLL      |       |    | [426] |
| M0500214        | YMYFSFNKKK-KSQIGKNAEDFEITYNITIKLKHPEYOYLNIIYDMMNGNKQSDRTGCVGLSKFGYIMKFDLSQYFPLLTTKKLFLRGIIEELLWFRIGETNGNTLL      |       |    | [393] |
| C0100511        | YMYFSFNKKK-KSQIGKNAEDFEITYNITIKLKHPEYOYLNIIYDMMNGNKQSDRTGCVGLSKFGYIMKFDLSQYFPLLTTKKLFLRGIIEELLWFRIGETNGNTLL      |       |    | [393] |
| M0102751        | YMYFSFNKKK-KSQIGKNAEDFEITYNITIKLKHPEYOYLNIIYDMMNGNKQSDRTGCVGLSKFGYIMKFDLSQYFPLLTTKKLFLRGIIEELLWFRIGETNGNTLL      |       |    | [403] |
| Pf 3D7          | NKNVRIWEANGTREFLDNRKLFHREVNDLGPYGFQWRHFGAEYTNMYDNYENKGVLDQLNKNIINLIKNDPSTRRIILCAWNVKDLDDOMALPPCHIILCOFYVFDGKLS   |       |    | [505] |
| Pf TZ 2000708   | NKNVRIWEANGTREFLDNRKLFHREVNDLGPYGFQWRHFGAEYTNMYDNYENKGVLDQLNKNIINLIKNDPSTRRIILCAWNVKDLDDOMALPPCHIILCOFYVFDGKLS   |       |    | [505] |
| Pow UG Po2012-3 | NKNVRIWEANGTREFLDNRKLFHREVNDLGPYGFQWRHFGAEYTNMYDNYENKGVLDQLNKNIINLIKNDPSTRRIILCAWNVKDLDDOMALPPCHIILCOFYVFDGKLS   |       |    | [536] |
| Pow NG Po2006   | NKNVRIWEANGTREFLDNRKLFHREVNDLGPYGFQWRHFGAEYTNMYDNYENKGVLDQLNKNIINLIKNDPSTRRIILCAWNVKDLDDOMALPPCHIILCOFYVFDGKLS   |       |    | [538] |
| Poc IN Po2003   | NKNVRIWEANGTREFLDNRKLFHREVNDLGPYGFQWRHFGAEYTNMYDNYENKGVLDQLNKNIINLIKNDPSTRRIILCAWNVKDLDDOMALPPCHIILCOFYVFDGKLS   |       |    | [534] |
| Poc ID Po2012-2 | NKNVRIWEANGTREFLDNRKLFHREVNDLGPYGFQWRHFGAEYTNMYDNYENKGVLDQLNKNIINLIKNDPSTRRIILCAWNVKDLDDOMALPPCHIILCOFYVFDGKLS   |       |    | [534] |
| M0500214        | NKNVRIWEANGTREFLDNRKLFHREVNDLGPYGFQWRHFGAEYTNMYDNYENKGVLDQLNKNIINLIKNDPSTRRIILCAWNVKDLDDOMALPPCHIILCOFYVFDGKLS   |       |    | [501] |
| C0100511        | NKNVRIWEANGTREFLDNRKLFHREVNDLGPYGFQWRHFGAEYTNMYDNYENKGVLDQLNKNIINLIKNDPSTRRIILCAWNVKDLDDOMALPPCHIILCOFYVFDGKLS   |       |    | [501] |
| M0102751        | NKNVRIWEANGTREFLDNRKLFHREVNDLGPYGFQWRHFGAEYTNMYDNYENKGVLDQLNKNIINLIKNDPSTRRIILCAWNVKDLDDOMALPPCHIILCOFYVFDGKLS   |       |    | [511] |
| Pf 3D7          | IMYQRSCDLGLGVFPNIASYSIFTHMIAQVCNLOPAQFIHVLGNNAHYNNHIDSLKIQLNRIYPYFPPTLKLNEPIKNIIEFTISDFTIENYVHDKITMDMAA          |       |    | [608] |
| Pf TZ 2000708   | IMYQRSCDLGLGVFPNIASYSIFTHMIAQVCNLOPAQFIHVLGNNAHYNNHIDSLKIQLNRIYPYFPPTLKLNEPIKNIIEFTISDFTIENYVHDKITMDMAA          |       |    | [608] |
| Pow UG Po2012-3 | IMYQRSCDLGLGVFPNIASYSIFTHMIAQVCNLOPAQFIHVLGNNAHYNNHIDSLKIQLNRIYPYFPPTLKLNEPIKNIIEFTISDFTIENYVHDKITMDMAA          |       |    | [639] |
| Pow NG Po2006   | IMYQRSCDLGLGVFPNIASYSIFTHMIAQVCNLOPAQFIHVLGNNAHYNNHIDSLKIQLNRIYPYFPPTLKLNEPIKNIIEFTISDFTIENYVHDKITMDMAA          |       |    | [641] |
| Poc IN Po2003   | IMYQRSCDLGLGVFPNIASYSIFTHMIAQVCNLOPAQFIHVLGNNAHYNNHIDSLKIQLNRIYPYFPPTLKLNEPIKNIIEFTISDFTIENYVHDKITMDMAA          |       |    | [637] |
| Poc ID Po2012-2 | IMYQRSCDLGLGVFPNIASYSIFTHMIAQVCNLOPAQFIHVLGNNAHYNNHIDSLKIQLNRIYPYFPPTLKLNEPIKNIIEFTISDFTIENYVHDKITMDMAA          |       |    | [637] |
| M0500214        | IMYQRSCDLGLGVFPNIASYSIFTHMIAQVCNLOPAQFIHVLGNNAHYNNHIDSLKIQLNRIYPYFPPTLKLNEPIKNIIEFTISDFTIENYVHDKITMDMAA          |       |    | [557] |
| C0100511        | IMYQRSCDLGLGVFPNIASYSIFTHMIAQVCNLOPAQFIHVLGNNAHYNNHIDSLKIQLNRIYPYFPPTLKLNEPIKNIIEFTISDFTIENYVHDKITMDMAA          |       |    | [557] |
| M0102751        | IMYQRSCDLGLGVFPNIASYSIFTHMIAQVCNLOPAQFIHVLGNNAHYNNHIDSLKIQLNRIYPYFPPTLKLNEPIKNIIEFTISDFTIENYVHDKITMDMAA          |       |    | [585] |

\* **GenBank accession numbers:** KX672037 (M0500214), KX672038 (C0100511), KX672039 (M0102751); KI926308 (Tanzania, TZ 2000708); Indonesia (ID): KP050408; India (IN): KP050405; Nigeria (NG): KP050406; Uganda (UG): KP050409.
