# Supplementary material for: Plasmodium malariae and Plasmodium ovale infections in the China–Myanmar border area
Source: PubMed Central journal article supplement (PMC5111346; doi:10.1186/s12936-016-1605-y), 2016-11-15
Supplement: 12936_2016_1605_MOESM8_ESM.pdf [file 12936_2016_1605_MOESM8_ESM.pdf]

**Additional file 8. Sequence alignment of PmDHPs from the China-Myanmar border area and other regions**

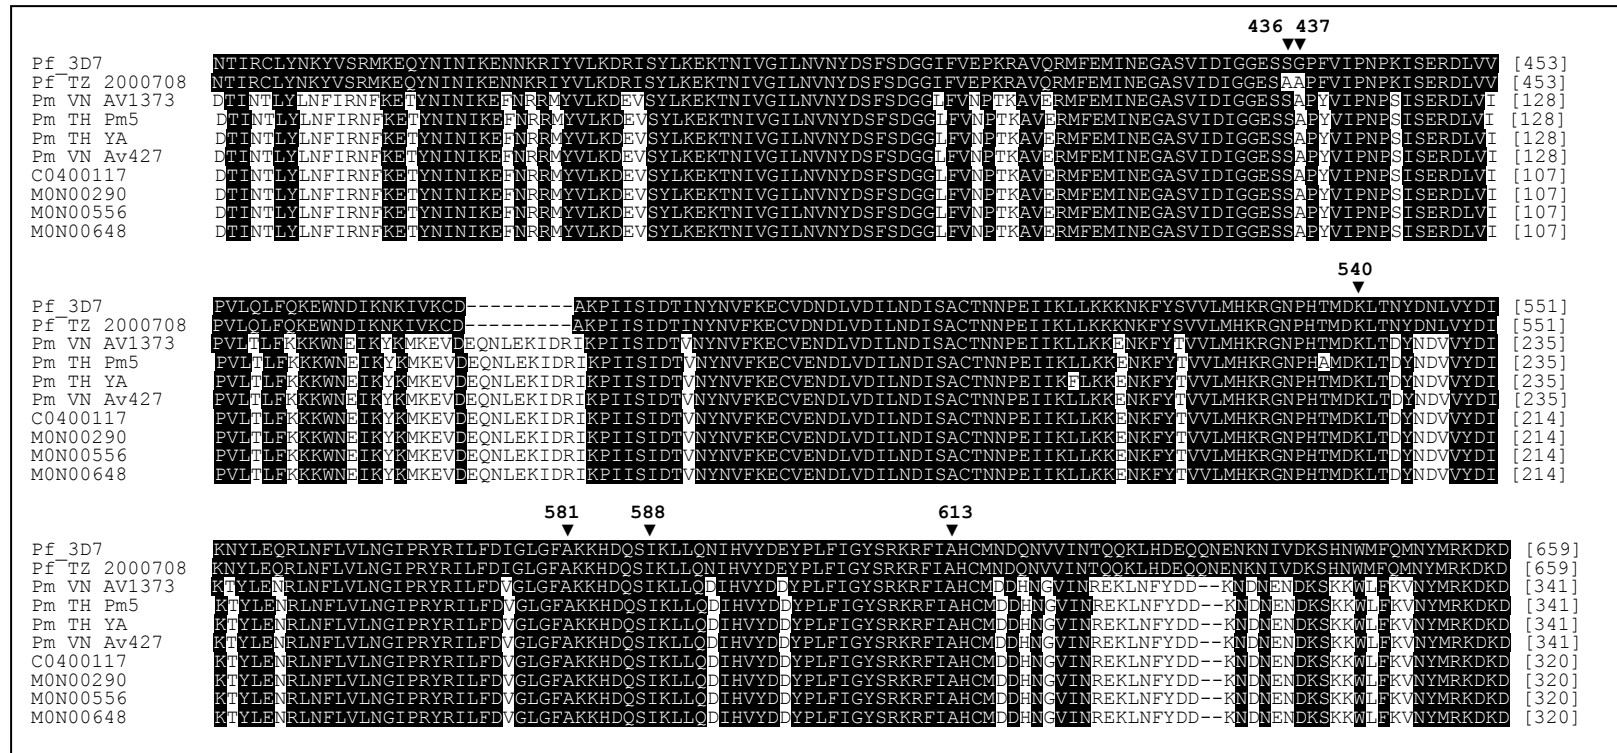

\* **GenBank accession numbers:** Isolates of China-Myanmar border: KX672040 (M0N00648), KX672041 (M0N00556), KX672042 (C0400117), KX672043 (M0N00290);

Pf: XM\_001349382 and KI926388 (Tanzania, TZ 2000708); Thailand (TH) isolates: KJ400022 (haplotype 3) and KJ400024 (haplotype 2). Viet Nam (VN) isolates:

KJ400023 (haplotype 4) and KJ400025 (haplotype 1).

Note that Pf 3D7 carries the mutant type A437G.
