# Supplementary material for: Plasmodium malariae and Plasmodium ovale infections in the China–Myanmar border area
Source: Springer Nature journal article supplement (doi:10.1186/s12936-016-1605-y), 2016-11-15
Supplement: MOESM6 [file 11048840]

**Additional file 6. Alignment of PoMSP1 sequences.**

**(A)** Nucleotide substitutions and the 12-nucleotide repeat region of *PoMSP-1* (numbering based on the sequence of the *PoMSP-1* from the Thai isolate Po-7). \*GenBank accession numbers: KX672045 (C0100511), KX672044 (M0500214); Cameroon (CM) isolates: FJ824670 and FJ824671; Thailand (TH) isolates: KC137340-KC137341, KC137343-KC137346 and KC137349.

**A.**

|          | 421    | 541    | 1929   | 2814 | *****                                                                                            | *****        | 2911 |
|----------|--------|--------|--------|------|--------------------------------------------------------------------------------------------------|--------------|------|
| TH Po-7  | TATCTA | CATCTT | CCTCAG | AA   | GCCGCTACACAAGTCACTACGCAATCCGCTACACAAACCGCTACACATGCCTCTACACATGCCTCTACACAAGCCGCTACACAAGCCGCTACACAA | -----        | GGT  |
| C0100511 | TATTTA | CATTTT | CCGCAG | AA   | GCCGCTACACAAGTCACTACGCAATCCGCTACACAAACCGCTACACATGCCTCTACACATGCCTCTACACAAGCCGCTACACAAGCCGCTACACAA | GCCGCTACACAA | GGT  |
| M0500214 | TATCTA | CATCTT | CCTCAG | AA   | GCCGCTACACAAGTCACTACGCAATCCGCTACACAAACCGCTACACATGCCTCTACACATGCCTCTACACAAGCCGCTACACAAGCCGCTACACAA | GCCGCTACACAA | GGT  |
| TH Po-10 | TATCTA | CATCTT | CCTCAG | AA   | GCCGCTACACAAGTCACTACGCAATCCGCTACACAAACCGCTACACATGCCTCTACACATGCCTCTACACAAGCCGCTACACAAGCCGCTACACAA | -----        | GGT  |
| TH Po-4  | TATCTA | CATCTT | CCTCAG | AA   | GCCGCTACACAAGTCACTACGCAATCCGCTACACAAACCGCTACACATGCCTCTACACATGCCTCTACACAAGCCGCTACACAAGCCGCTACACAA | -----        | GGT  |
| CM OM1A  | TATCTA | CATCTT | CCTCAG | AA   | GCCGCTACACAAGTCACTACGCAATCCGCTACACAAACCGCTACACATGCCTCTACACATGCCTCTACACAAGCCGCTACACAAGCCGCTACACAA | -----        | GGT  |
| CM OM1B  | TATCTA | CATCTT | CCTCAG | AA   | GCCGCTACACAAGTCACTACGCAATCCGCTACACAAACCGCTACACATGCCTCTACACATGCCTCTACACAAGCCGCTACACAAGCCGCTACACAA | -----        | GGT  |
| TH Po-1  | TACTTA | CATCTT | CCTCAG | ---  | -----TCACTACGCAAAGCAGT-----GTTCCACAGGCACTAC-----TTTCCAGTTCCTAC-----                              | -----        | ---  |
| TH Po-2  | TACTTA | CATCTT | CCTCAG | ---  | -----TCACTACGCAAAGCAGT-----GTTCCACAGGCACTAC-----TTTCCAGTTCCTAC-----                              | -----        | ---  |
| TH Po-5  | TACTTA | CATCTT | CCTCAG | ---  | -----TCACTACGCAAAGCAGT-----GTTCCACAGGCACTAC-----TTTCCAGTTCCTAC-----                              | -----        | ---  |
| TH Po-6  | TACTTA | CATCTT | CCTCAG | ---  | -----TCACTACGCAAAGCAGT-----GTTCCACAGGCACTAC-----TTTCCAGTTCCTAC-----                              | -----        | ---  |

**(B)** Amino acid polymorphisms in the variable domains of PoMSP-1. Protein sequence numbering was based on the sequence of the PoMSP-1 from the Thai isolate Po-7. \*GenBank accession numbers: KX672045 (C0100511), KX672044 (M0500214); Cameroon (CM) isolates: FJ824670 and FJ824671; Thailand (TH) isolates: KC137340-KC137341, KC137343-KC137346 and KC137349.

B.

|          | Variable domain 1                                                                               | Variable domain 2                                    | Variable domain 3            |
|----------|-------------------------------------------------------------------------------------------------|------------------------------------------------------|------------------------------|
|          | 53                                                                                              | 309                                                  | 282                          |
|          | 1681                                                                                            | 1691                                                 |                              |
| TH Po-7  | LQKLEVTFTTGRG-IGSSTTSVSSTPNGASTHLPTDRDSSNI                                                      | YGEVAVSNGTGSAGAASGTNASASSGOENSSSESETEKYNKAKAL        | EIAEKESKV-TPPSNTASOTQLOEEIN  |
| C0100511 | LQKLEVTFTTGRG-IGSSTTSVSSTPNGASTHLPTDRDSSNI                                                      | YGEVAVSNGTGSAGAASGTNASASSGOENSSSESETEKYNKAKAL        | EIAEKESKV-TPPSNTASOTQLOEEIN  |
| M0500214 | LQKLEVTFTTGRG-IGSSTTSVSSTPNGASTHLPTDRDSSNI                                                      | YGEVAVSNGTGSAGAASGTNASASSGOENSSSESETEKYNKAKAL        | EIAEKESKV-TPPSNTASOTQLOEEIN  |
| TH Po-10 | LQKLEVTFTTGRG-IGSSTTSVSSTPNGASTHLPTDRDSSNI                                                      | YGEVAVSNGTGSAGAASGTNASASSGOENSSSESETEKYNKAKAL        | EIAEKESKV-TPPSNTASOTQLOEEIN  |
| TH Po-4  | LQKLEVTFTTGRG-IGSSTTSVSSTPNGASTHLPTDRDSSNI                                                      | YGEVAVSNGTGSAGAASGTNASASSGOENSSSESETEKYNKAKAL        | EIAEKESKV-TPPSNTASOTQLOEEIN  |
| CM OM1A  | LQKLEVTFTTGRG-IGSSTTSVSSTPNGASTHLPTDRDSSNI                                                      | YGEVAVSNGTGSAGAASGTNASASSGOENSSSESETEKYNKAKAL        | EIAEKESKV-TPPSNTASOTQLOEEIN  |
| CM OM1B  | LQKLEVTFTTGRG-IGSSTTSVSSTPNGASTHLPTDRDSSNI                                                      | YGEVAVSNGTGSAGAASGTNASASSGOENSSSESETEKYNKAKAL        | EIAEKESKV-TPPSNTASOTQLOEEIN  |
| TH Po-1  | VDOIKTAANTAAAGCNVRSSTSSVSTTPSSAAAAAASNDADNNV                                                    | HSEDAVSGSTGNARAASGANVHANSGBSSSDIEKREKYDKDKKV         | QTAEKESKVI-TPPNNTTLOTQLOEEIS |
| TH Po-2  | VDOIKTAANTAAAGCNVRSSTSSVSTTPSSAAAAAASNDADNNV                                                    | HSEDAVSGSTGNARAASGANVHANSGBSSSDIEKREKYDKDKKV         | QTAEKESKVI-TPPNNTTLOTQLOEEIS |
| TH Po-5  | VDOIKTAANTAAAGCNVRSSTSSVSTTPSSAAAAAASNDADNNV                                                    | HSEDAVSGSTGNARAASGANVHANSGBSSSDIEKREKYDKDKKV         | QTAEKESKVI-TPPNNTTLOTQLOEEIS |
| TH Po-6  | VDOIKTAANTAAAGCNVRSSTSSVSTTPSSAAAAAASNDADNNV                                                    | HSEDAVSGSTGNARAASGANVHANSGBSSSDIEKREKYDKDKKV         | QTAEKESKVI-TPPNNTTLOTQLOEEIS |
|          |                                                                                                 | Variable domain 4                                    |                              |
|          | 679                                                                                             |                                                      | 797                          |
| TH Po-7  | DKEKTNPTPATAQAGALPVRGVDEILVMGNENEATAVTSPPSPSTSTSTEASEGATQSATTVOSETSVVQIG                        | TPVAHPGASAPPTPGVPVAPAEAPAPAPAT                       | EAQAQAPVQPTQGOVQA            |
| C0100511 | DKEKTNPTPATAQAGALPVRGVDEILVMGNENEATAVTSPPSPSTSTSTEASEGATQSATTVOSETSVVQIG                        | TPVAHPGASAPPTPGVPVAPAEAPAPAPAT                       | EAQAQAPVQPTQGOVQA            |
| M0500214 | DKEKTNPTPATAQAGALPVRGVDEILVMGNENEATAVTSPPSPSTSTSTEASEGATQSATTVOSETSVVQIG                        | TPVAHPGASAPPTPGVPVAPAEAPAPAPAT                       | EAQAQAPVQPTQGOVQA            |
| TH Po-10 | DKEKTNPTPATAQAGALPVRGVDEILVMGNENEATAVTSPPSPSTSTSTEASEGATQSATTVOSETSVVQIG                        | TPVAHPGASAPPTPGVPVAPAEAPAPAPAT                       | EAQAQAPVQPTQGOVQA            |
| TH Po-4  | DKEKTNPTPATAQAGALPVRGVDEILVMGNENEATAVTSPPSPSTSTSTEASEGATQSATTVOSETSVVQIG                        | TPVAHPGASAPPTPGVPVAPAEAPAPAPAT                       | EAQAQAPVQPTQGOVQA            |
| CM OM1A  | DKEKTNPTPATAQAGALPVRGVDEILVMGNENEATAVTSPPSPSTSTSTEASEGATQSATTVOSETSVVQIG                        | TPVAHPGASAPPTPGVPVAPAEAPAPAPAT                       | EAQAQAPVQPTQGOVQA            |
| CM OM1B  | DKEKTNPTPATAQAGALPVRGVDEILVMGNENEATAVTSPPSPSTSTSTEASEGATQSATTVOSETSVVQIG                        | TPVAHPGASAPPTPGVPVAPAEAPAPAPAT                       | EAQAQAPVQPTQGOVQA            |
| TH Po-1  | EKEKATPTQAAAQGVQPVQGVDEILVMGNENEITTEV----                                                       | PSTSTVPAAVVAQFTEATTSAPGAGGLPGAAGFPGV                 | GAAGEPGVPGVPGAQPPSSASAP      |
| TH Po-2  | EKEKATPTQAAAQGVQPVQGVDEILVMGNENEITTEV----                                                       | PSTSTVPAAVVAQFTEATTSAPGAGGLPGAAGFPGV                 | GAAGEPGVPGVPGAQPPSSASAP      |
| TH Po-5  | EKEKATPTQAAAQGVQPVQGVDEILVMGNENEITTEV----                                                       | PSTSTVPAAVVAQFTEATTSAPGAGGLPGAAGFPGV                 | GAAGEPGVPGVPGAQPPSSASAP      |
| TH Po-6  | EKEKATPTQAAAQGVQPVQGVDEILVMGNENEITTEV----                                                       | PSTSTVPAAVVAQFTEATTSAPGAGGLPGAAGFPGV                 | GAAGEPGVPGVPGAQPPSSASAP      |
|          |                                                                                                 | Variable domain 5                                    |                              |
|          | 908                                                                                             |                                                      | 1023                         |
| TH Po-7  | DKAIKAFLETQGITGAPDATPLVTTQATTOAATQVTTQASATQATATHASTHASTQAAATQAAATC                              | GNVPOASNAEHTPSATTVNPAATTPDKSLEESTSEGLMTOGNADDDVSEPEE |                              |
| C0100511 | DKAIKAFLETQGITGAPDATPLVTTQATTOAATQVTTQASATQATATHASTHASTQAAATQAAATC                              | GNVPOASNAEHTPSATTVNPAATTPDKSLEESTSEGLMTOGNADDDVSEPEE |                              |
| M0500214 | DKAIKAFLETQGITGAPDATPLVTTQATTOAATQVTTQASATQATATHASTHASTQAAATQAAATC                              | GNVPOASNAEHTPSATTVNPAATTPDKSLEESTSEGLMTOGNADDDVSEPEE |                              |
| TH Po-10 | DKAIKAFLETQGITGAPDATPLVTTQATTOAATQVTTQASATQATATHASTHASTQAAATQAAATC                              | GNVPOASNAEHTPSATTVNPAATTPDKSLEESTSEGLMTOGNADDDVSEPEE |                              |
| TH Po-4  | DKAIKAFLETQGITGAPDATPLVTTQATTOAATQVTTQASATQATATHASTHASTQAAATQAAATC                              | GNVPOASNAEHTPSATTVNPAATTPDKSLEESTSEGLMTOGNADDDVSEPEE |                              |
| CM OM1A  | DKAIKAFLETQGITGAPDATPLVTTQATTOAATQVTTQASATQATATHASTHASTQAAATQAAATC                              | GNVPOASNAEHTPSATTVNPAATTPDKSLEESTSEGLMTOGNADDDVSEPEE |                              |
| CM OM1B  | DKAIKAFLETQGITGAPDATPLVTTQATTOAATQVTTQASATQATATHASTHASTQAAATQAAATC                              | GNVPOASNAEHTPSATTVNPAATTPDKSLEESTSEGLMTOGNADDDVSEPEE |                              |
| TH Po-1  | EVAVKAFLETHGITGTAP-----VTTQSSGPPATTSPP-----VTPPAATHHT-----TTTNPATPAPSK-----FEETLVAQGNADDDAPAPEE |                                                      |                              |
| TH Po-2  | EVAVKAFLETHGITGTAP-----VTTQSSGPPATTSPP-----VTPPAATHHT-----TTTNPATPAPSK-----FEETLVAQGNADDDAPAPEE |                                                      |                              |
| TH Po-5  | EVAVKAFLETHGITGTAP-----VTTQSSGPPATTSPP-----VTPPAATHHT-----TTTNPATPAPSK-----FEETLVAQGNADDDAPAPEE |                                                      |                              |
| TH Po-6  | EVAVKAFLETHGITGTAP-----VTTQSSGPPATTSPP-----VTPPAATHHT-----TTTNPATPAPSK-----FEETLVAQGNADDDAPAPEE |                                                      |                              |
|          |                                                                                                 | Variable domain 6                                    | Variable domain 7            |
|          | 1275                                                                                            | 1344                                                 | 1494 1504                    |
| TH Po-7  | STGAATQTOGGEGASAAAPP-----PAAPPAASAAAPGTANGETATVAHAEDYTEDDNNVIVLPLFGKKGTHAFD                     |                                                      | KTGDDATKATN                  |
| C0100511 | STGAATQTOGGEGASAAAPP-----PAAPPAASAAAPGTANGETATVAHAEDYTEDDNNVIVLPLFGKKGTHAFD                     |                                                      | KTGDDATKATN                  |
| M0500214 | STGAATQTOGGEGASAAAPP-----PAAPPAASAAAPGTANGETATVAHAEDYTEDDNNVIVLPLFGKKGTHAFD                     |                                                      | KTGDDATKATN                  |
| TH Po-10 | STGAATQTOGGEGASAAAPP-----PAAPPAASAAAPGTANGETATVAHAEDYTEDDNNVIVLPLFGKKGTHAFD                     |                                                      | KTGDDATKATN                  |
| TH Po-4  | STGAATQTOGGEGASAAAPP-----PAAPPAASAAAPGTANGETATVAHAEDYTEDDNNVIVLPLFGKKGTHAFD                     |                                                      | KTGDDATKATN                  |
| CM OM1A  | STGAATQTOGGEGASAAAPP-----PAAPPAASAAAPGTANGETATVAHAEDYTEDDNNVIVLPLFGKKGTHAFD                     |                                                      | KTGDDATKATN                  |
| CM OM1B  | STGAATQTOGGEGASAAAPP-----PAAPPAASAAAPGTANGETATVAHAEDYTEDDNNVIVLPLFGKKGTHAFD                     |                                                      | KTGDDATKATN                  |
| TH Po-1  | PTCPTAATGAVGGGAPAEAEA-----VAAPPAAPAGTGTANGETATVAHAEDYTEDDNNVIVLPLFGKKGTHAFD                     |                                                      | KTGDDATKATN                  |
| TH Po-2  | PTCPTAATGAVGGGAPAEAEA-----VAAPPAAPAGTGTANGETATVAHAEDYTEDDNNVIVLPLFGKKGTHAFD                     |                                                      | KTGDDATKATN                  |
| TH Po-5  | PTCPTAATGAVGGGAPAEAEA-----VAAPPAAPAGTGTANGETATVAHAEDYTEDDNNVIVLPLFGKKGTHAFD                     |                                                      | KTGDDATKATN                  |
| TH Po-6  | PTCPTAATGAVGGGAPAEAEA-----VAAPPAAPAGTGTANGETATVAHAEDYTEDDNNVIVLPLFGKKGTHAFD                     |                                                      | KTGDDATKATN                  |
